# Supplementary material for: Detection of Antiviral Tissue Responses and Increased Cell Stress in the Pancreatic Islets of Newly Diagnosed Type 1 Diabetes Patients: Results From the DiViD Study
Source: PubMed Central journal article supplement (PMC9360491; doi:10.3389/fendo.2022.881997), 2022-07-26
Supplement: Table_1.pdf [file Table_1.pdf]

Supplementary table 1

| <b>nPOD ID</b> | <b>Sex</b> | <b>Age at death (y)</b> | <b>Immunfluorescent</b> | <b>Laser capture</b> |
|----------------|------------|-------------------------|-------------------------|----------------------|
| 6010           | Female     | 47                      |                         | x                    |
| 6012           | Female     | 68                      |                         | x                    |
| 6013           | Male       | 65                      |                         | x                    |
| 6019           | Male       | 42                      |                         | x                    |
| 6024           | Male       | 21                      |                         | x                    |
| 6048           | Male       | 30                      | x                       | x                    |
| 6075           | Male       | 16                      |                         | x                    |
| 6099           | Male       | 14                      |                         | x                    |
| 6102           | Female     | 45                      |                         | x                    |
| 6129           | Female     | 43                      |                         | x                    |
| 6140           | Male       | 38                      | x                       | x                    |
| 6162           | Male       | 23                      | x                       | x                    |
| 6165           | Female     | 46                      |                         | x                    |
| 6168           | Male       | 51                      |                         | x                    |
| 6179           | Female     | 22                      | x                       | x                    |
| 6227           | Female     | 17                      |                         | x                    |
| 6229           | Female     | 31                      | x                       | x                    |
| 6251           | Female     | 33                      | x                       | x                    |
