# Supplementary material for: Detection of Antiviral Tissue Responses and Increased Cell Stress in the Pancreatic Islets of Newly Diagnosed Type 1 Diabetes Patients: Results From the DiViD Study
Source: PubMed Central journal article supplement (PMC9360491; doi:10.3389/fendo.2022.881997), 2022-07-26
Supplement: Table_2.pdf [file Table_2.pdf]

Supplementary table 2

| <b>Antibody</b> | <b>Vendor</b>    | <b>Cat #</b>      | <b>Antibody conditions</b> | <b>HIER</b>    | <b>Block</b> |
|-----------------|------------------|-------------------|----------------------------|----------------|--------------|
| MDA5            | Abcam            | ab69983           | 1/500 (1h RT TSA)          | Citrate<br>pH6 | 5%NGS        |
| PKR             | Abcam            | ab32052           | 1/700 (overnight 4C)       | Citrate<br>pH6 | 5%NGS        |
| MxA             | From O<br>Haller | Kindly<br>donated | 1/100 (1h RT TSA)          | Citrate<br>pH6 | 5%NGS        |
| Insulin         | Dako             | A0564             | 1/343 (1h RT)              | Citrate<br>pH6 | 5%NGS        |
| Glucagon        | Abcam            | ab10988           | 1/2000 (1h RT)             | Citrate<br>pH6 | 5%NGS        |
| Somatostatin    | Abcam            | ab30788           | 1/200 (overnight 4C)       | Citrate<br>pH6 | 5%NGS        |
| VP1             | Dako             | M7064             | 1/1400 (1h RT)             | Citrate<br>pH6 | 5%NGS        |
