# Supplementary material for: Detection of Antiviral Tissue Responses and Increased Cell Stress in the Pancreatic Islets of Newly Diagnosed Type 1 Diabetes Patients: Results From the DiViD Study
Source: PubMed Central journal article supplement (PMC9360491; doi:10.3389/fendo.2022.881997), 2022-07-26
Supplement: Table_3.pdf [file Table_3.pdf]

Supplementary table 3

| Transcripts Cluster Id | Corrected p-value | Fold change    | Entrez gene                   | Gene symbol                     |
|------------------------|-------------------|----------------|-------------------------------|---------------------------------|
| 16817790               | 9,61E-06          | 1,6053501      | 226                           | ALDOA                           |
| 16906534               | 9,61E-06          | -<br>4,0889874 | 6772                          | STAT1                           |
| 16932300               | 9,61E-06          | 1,7018756      | 7353                          | UFD1L                           |
| 16821614               | 1,06E-05          | 1,7480265      | 1327                          | COX4I1                          |
| 16965773               | 1,06E-05          | 2,0788307      | 100422937                     | MIR4275                         |
| 16977045               | 1,06E-05          | -19,04026      | 4283                          | CXCL9                           |
| 16721715               | 1,36E-05          | 1,504834       | 6157///619562                 | RPL27A SNORA3                   |
| 16664272               | 2,24E-05          | 1,8440099      | 440567///7388                 | UQCRHL                          |
| 16771216               | 2,24E-05          | 1,9564127      | 6175                          | RPLP0                           |
| 16748751               | 3,24E-05          | 1,58976        | 11171///100653179///100653013 | STRAP LOC100653179 LOC100653013 |
| 17100173               | 3,47E-05          | 1,8443079      | 8721                          | EDF1                            |
| 16948738               | 3,97E-05          | 1,308604       | 1173                          | AP2M1                           |
| 16962264               | 5,07E-05          | 1,8260458      | 64110                         | MAGEF1                          |
| 16670673               | 5,88E-05          | 1,9787961      |                               |                                 |
| 16680274               | 5,88E-05          | 1,5172502      | 54998                         | AURKAIP1                        |
| 16693642               | 5,88E-05          | 1,8941478      | 10899                         | JTB                             |
| 16701287               | 5,88E-05          | 1,532219       | 159                           | ADSS                            |
| 16752223               | 5,88E-05          | 2,0632873      | 29095                         | ORMDL2                          |
| 16755487               | 5,88E-05          | -2,782032      | 100302289                     | MIR1251                         |
| 16758549               | 5,88E-05          | 1,7651839      | 51329                         | ARL6IP4                         |
| 16833742               | 5,88E-05          | 1,8507832      | 6143                          | RPL19                           |
| 16858860               | 5,88E-05          | 2,0103533      | 28974                         | C19orf53                        |
| 16869660               | 5,88E-05          | 1,8229016      | 4713                          | NDUFB7                          |
| 16935601               | 5,88E-05          | 1,4820088      |                               |                                 |
| 16973322               | 5,88E-05          | 1,6577387      | 521                           | ATP5I                           |

|          |          |                |                          |                     |
|----------|----------|----------------|--------------------------|---------------------|
| 17011683 | 5,88E-05 | 1,9356555      | 112495                   | GTF3C6              |
| 17024418 | 5,88E-05 | 1,8798299      | 83443                    | SF3B5               |
| 17092737 | 5,88E-05 | 1,4081752      | 6194                     | RPS6                |
| 17117588 | 5,88E-05 | 1,6645302      | 727803                   | LOC727803           |
| 16800450 | 6,15E-05 | -<br>1,9730647 | 567                      | B2M                 |
| 16662744 | 6,32E-05 | 2,1710012      | 4725                     | NDUFS5              |
| 16969344 | 6,32E-05 | 1,9090427      | 493856                   | CISD2               |
| 16935264 | 6,47E-05 | 1,5658576      | 91582                    | RPS19BP1            |
| 16766260 | 6,75E-05 | 1,5567882      | 506                      | ATP5B               |
| 16678303 | 6,81E-05 | 1,632163       | 375///100500810          | ARF1 MIR3620        |
| 16765134 | 6,81E-05 | 1,6993176      | 3856                     | KRT8                |
| 16804778 | 6,81E-05 | 1,5202425      | 51335                    | NGRN                |
| 16843511 | 6,81E-05 | -<br>3,4628165 | 6352                     | CCL5                |
| 17002871 | 6,81E-05 | 1,6904979      |                          |                     |
| 17013002 | 6,81E-05 | 1,7957641      | 23593                    | HEBP2               |
| 17060237 | 6,81E-05 | 1,6330276      | 9551///100526740///26024 | ATP5J2 ATP5J2-PTCD1 |
| 17100697 | 6,81E-05 | -1,859603      | 4541                     | ND6                 |
| 16744684 | 6,86E-05 | 1,492851       | 8882                     | ZNF259              |
| 16726439 | 6,89E-05 | 1,7886096      | 25824                    | PRDX5               |
| 16835589 | 7,20E-05 | 2,1396792      |                          |                     |
| 16857353 | 7,20E-05 | 1,7645236      | 25873                    | RPL36               |
| 17056830 | 7,20E-05 | -<br>2,0149221 |                          | TRGV10              |
| 17059776 | 7,20E-05 | -<br>2,4087741 | 219285                   | SAMD9L              |
| 16664100 | 7,30E-05 | 1,9178879      | 10327                    | AKR1A1              |
| 16959187 | 7,30E-05 | 1,5974346      | 11222                    | MRPL3               |
| 17027330 | 7,30E-05 | -1,551038      | 3135                     | HLA-G               |

|          |          |                |                       |                    |
|----------|----------|----------------|-----------------------|--------------------|
| 17037658 | 7,44E-05 | -<br>1,5491024 | 3135                  | HLA-G              |
| 16856153 | 7,51E-05 | 2,461526       | 10907                 | TXNL4A             |
| 16808363 | 7,62E-05 | 1,8066527      | 100302254             | MIR1282            |
| 16872267 | 7,66E-05 | 1,9915428      | 2091                  | FBL                |
| 16680348 | 8,19E-05 | 1,650894       | 29101                 | SSU72              |
| 16734840 | 8,19E-05 | -<br>1,8833305 | 3043                  | HBB                |
| 16782122 | 8,19E-05 | -<br>6,4633994 | 28738///28755///28663 | TRAJ17 TRAC TRAV20 |
| 16840284 | 8,19E-05 | 1,8364732      | 708                   | C1QBP              |
| 16856476 | 8,19E-05 | 2,1889434      | 513                   | ATP5D              |
| 16857429 | 8,19E-05 | 1,6084784      | 8192                  | CLPP               |
| 16972305 | 8,19E-05 | 1,5875939      | 1182                  | CLCN3              |
| 16830182 | 8,52E-05 | 1,9689989      | 84817                 | TXNDC17            |
| 16959760 | 8,52E-05 | 1,5988265      | 9276                  | COPB2              |
| 16825923 | 8,77E-05 | 1,4193965      | 79759                 | ZNF668             |
| 16814488 | 8,82E-05 | 1,9632945      | 10273                 | STUB1              |
| 16977912 | 8,82E-05 | 2,2758563      | 84992                 | PIGY               |
| 17078480 | 8,82E-05 | 2,1424837      | 28957///7163          | MRPS28 TPD52       |
| 16690720 | 8,98E-05 | 1,4544479      | 10542                 | HBXIP              |
| 16748527 | 8,98E-05 | 2,186047       | 387841                | RPL13AP20          |
| 17000800 | 8,98E-05 | 1,7978046      | 4695                  | NDUFA2             |
| 17001654 | 8,98E-05 | -<br>2,6456656 | 972                   | CD74               |
| 16855065 | 9,02E-05 | 1,8298297      | 51124                 | IER3IP1            |
| 17098322 | 9,02E-05 | 1,3364692      | 11224                 | RPL35              |
| 16700888 | 9,08E-05 | 2,2007434      | 4811                  | NID1               |
| 17084403 | 9,08E-05 | 2,0360258      | 54926                 | UBE2R2             |
| 16844119 | 9,55E-05 | 1,4891949      |                       |                    |

|          |          |                |                                     |                                             |
|----------|----------|----------------|-------------------------------------|---------------------------------------------|
| 16871051 | 9,88E-05 | 1,7001603      | 7386                                | UQCRFS1                                     |
| 16872640 | 1,00E-04 | 2,3451931      | 10567                               | RABAC1                                      |
| 16873329 | 1,00E-04 | -<br>3,1335533 | 2354                                | FOSB                                        |
| 17036605 | 1,00E-04 | 1,4326719      |                                     |                                             |
| 16871359 | 1,04E-04 | 1,6027057      | 93099                               | DMKN                                        |
| 16885526 | 1,07E-04 | 1,6840968      | 92856                               | IMP4                                        |
| 16910309 | 1,07E-04 | -<br>1,3880244 |                                     |                                             |
| 16693515 | 1,09E-04 | 1,6542281      | 3608                                | ILF2                                        |
| 16942906 | 1,09E-04 | 1,6053895      | 25978                               | CHMP2B                                      |
| 17031178 | 1,09E-04 | -<br>2,2270894 | 3118///3117///100509457///100507718 | HLA-DQA2 HLA-DQA1 LOC100509457 LOC100507718 |
| 17093090 | 1,09E-04 | -<br>2,0662997 | 23586                               | DDX58                                       |
| 16913198 | 1,10E-04 | 1,9078462      | 140823                              | ROMO1                                       |
| 17023484 | 1,18E-04 | 1,7062277      | 93663                               | ARHGAP18                                    |
| 16845259 | 1,21E-04 | 1,9855126      | 28958                               | CCDC56                                      |
| 17008088 | 1,25E-04 | 1,8310621      | 1337                                | COX6A1 COX6A1P2                             |
| 16989130 | 1,25E-04 | 1,6114024      | 27089                               | UQCRQ                                       |
| 16860047 | 1,30E-04 | 1,7289727      | 51079///374887                      | NDUFA13 YJEFN3                              |
| 16873007 | 1,30E-04 | 1,9493725      | 23474                               | ETHE1                                       |
| 16933630 | 1,30E-04 | 1,3315512      | 8563                                | THOC5                                       |
| 17049060 | 1,30E-04 | -<br>1,7504992 |                                     |                                             |
| 17057983 | 1,30E-04 | 1,6530797      | 51142                               | CHCHD2                                      |
| 16865175 | 1,33E-04 | 1,3855374      | 4696                                | NDUFA3                                      |
| 16834441 | 1,48E-04 | 1,8440464      | 84313                               | VPS25                                       |
| 16772733 | 1,49E-04 | 1,439239       | 2802                                | GOLGA3                                      |
| 16821021 | 1,49E-04 | 1,8977748      | 5713                                | PSMD7                                       |

|          |          |                |                                            |                                                      |
|----------|----------|----------------|--------------------------------------------|------------------------------------------------------|
| 16825753 | 1,49E-04 | 1,5558952      | 10421                                      | CD2BP2                                               |
| 16866946 | 1,49E-04 | 2,1292374      | 26517                                      | TIMM13                                               |
| 17027390 | 1,49E-04 | 1,2975389      | 135644                                     | TRIM40                                               |
| 17098626 | 1,49E-04 | 1,5093346      | 203                                        | AK1                                                  |
| 17104540 | 1,49E-04 | 1,4828246      | 1741                                       | DLG3                                                 |
| 16814872 | 1,49E-04 | 1,4425532      | 10607                                      | TBL3                                                 |
| 16863946 | 1,49E-04 | 1,7298723      | 10856                                      | RUVBL2                                               |
| 16957738 | 1,49E-04 | 1,3622946      | 8702                                       | B4GALT4                                              |
| 17041260 | 1,55E-04 | -<br>1,9779669 | 3118///100509457///100507718///3117        | HLA-DQA2 LOC100509457 LOC100507718 HLA-DQA1          |
| 16666509 | 1,58E-04 | -<br>2,5458012 | 10561                                      | IFI44                                                |
| 16842237 | 1,58E-04 | 7,195089       | 780853                                     | SNORD3C                                              |
| 16980768 | 1,61E-04 | -<br>1,7801794 |                                            |                                                      |
| 17109706 | 1,64E-04 | 1,833016       | 1964                                       | EIF1AX                                               |
| 17028345 | 1,65E-04 | -<br>2,0689793 | 3118///3117                                | HLA-DQA2 HLA-DQA1                                    |
| 17029712 | 1,66E-04 | -<br>2,2845814 | 3123///3125///3126///100507714///100507709 | HLA-DRB1 HLA-DRB3 HLA-DRB4 LOC100507714 LOC100507709 |
| 16739117 | 1,69E-04 | 1,3864251      | 746                                        | C11orf10                                             |
| 16765744 | 1,69E-04 | 1,3029301      | 967                                        | CD63                                                 |
| 17057174 | 1,72E-04 | 1,7589284      | 5425                                       | POLD2                                                |
| 16869387 | 1,76E-04 | 1,8941089      | 90480                                      | GADD45GIP1                                           |
| 16758182 | 1,77E-04 | -<br>2,2803228 |                                            |                                                      |
| 17039914 | 1,77E-04 | -<br>2,2652972 | 3123///3125///3126///100507714///100507709 | HLA-DRB1 HLA-DRB3 HLA-DRB4 LOC100507714 LOC100507709 |
| 17071259 | 1,77E-04 | 2,0205107      | 203111                                     | C8orf47                                              |
| 17117542 | 1,77E-04 | -<br>1,3623428 |                                            |                                                      |

|          |          |                |                              |                                    |
|----------|----------|----------------|------------------------------|------------------------------------|
| 16658864 | 1,83E-04 | 1,3961703      | 5226                         | PGD                                |
| 16669485 | 1,83E-04 | -<br>1,6347804 |                              |                                    |
| 16727936 | 1,83E-04 | 1,4852564      | 4723                         | NDUFV1                             |
| 16810514 | 1,83E-04 | 2,0584335      | 5479                         | PIIB                               |
| 16829235 | 1,83E-04 | 2,0068986      | 353                          | APRT                               |
| 16856757 | 1,83E-04 | 1,820403       | 4946                         | OAZ1                               |
| 16863091 | 1,83E-04 | 1,6420385      | 5819                         | PVRL2                              |
| 16977396 | 1,83E-04 | 2,0372362      | 79966                        | SCD5                               |
| 17019338 | 1,83E-04 | 1,5157295      | 10591                        | C6orf108                           |
| 17041240 | 1,83E-04 | -3,898334      | 100509457///100507718///3117 | LOC100509457 LOC100507718 HLA-DQA1 |
| 16685482 | 1,85E-04 | 1,8842115      | 79693                        | YRDC                               |
| 16699739 | 1,85E-04 | 1,4858211      | 142                          | PARP1                              |
| 16790464 | 1,85E-04 | 1,9129746      | 1603                         | DAD1                               |
| 16825097 | 1,85E-04 | 1,9008319      | 4706                         | NDUFAB1                            |
| 16825468 | 1,85E-04 | 1,9683814      | 552900///654483///440354     | BOLA2 BOLA2B LOC440354             |
| 16825683 | 1,85E-04 | 1,9670962      | 552900///654483///440354     | BOLA2 BOLA2B LOC440354             |
| 16839769 | 1,85E-04 | 1,5061452      | 100533970///30851///5026     | P2RX5-TAX1BP3                      |
| 16876764 | 1,85E-04 | -<br>1,6034125 | 91543                        | RSAD2                              |
| 17036504 | 1,85E-04 | -<br>2,2638543 |                              |                                    |
| 16977052 | 1,85E-04 | -6,469104      | 3627                         | CXCL10                             |
| 17004974 | 1,86E-04 | 1,5184472      | 51406                        | NOL7                               |
| 17083847 | 1,86E-04 | 1,6178629      | 10670                        | RRAGA                              |
| 17115352 | 1,86E-04 | 1,5278205      | 8260///393                   | NAA10 ARHGAP4                      |
| 16862596 | 1,88E-04 | 1,9224035      | 6223                         | RPS19                              |
| 16852389 | 1,90E-04 | -<br>2,2552292 | 1630                         | DCC                                |
| 16787902 | 1,96E-04 | 8,145993       | 12                           | SERPINA3                           |

|          |          |                |                  |                                    |
|----------|----------|----------------|------------------|------------------------------------|
| 16868130 | 1,96E-04 | 1,8387715      | 51293            | CD320                              |
| 17103784 | 1,96E-04 | -<br>1,6398962 | 170685           | NUDT10                             |
| 16889929 | 2,00E-04 | 1,7584442      |                  |                                    |
| 16981266 | 2,00E-04 | -<br>1,5013981 | 91351            | DDX60L                             |
| 16989408 | 2,00E-04 | -<br>1,6684508 | 100616209        | MIR4461                            |
| 16681473 | 2,01E-04 | 1,922047       |                  |                                    |
| 16757710 | 2,01E-04 | 1,8065763      | 5037             | PEBP1                              |
| 17032870 | 2,01E-04 | -<br>1,4926887 | 3135             | HLA-G                              |
| 17037719 | 2,01E-04 | 1,2916037      | 135644           | TRIM40                             |
| 17102632 | 2,01E-04 | 1,7150263      | 58526            | MID1IP1                            |
| 16868797 | 2,02E-04 | 1,585508       | 10053            | AP1M2                              |
| 16861047 | 2,08E-04 | 1,6497496      | 10430            | TMEM147                            |
| 16935490 | 2,13E-04 | 1,4879924      | 4809             | NHP2L1                             |
| 17103509 | 2,13E-04 | 1,8468839      | 10084            | PQBP1                              |
| 16943040 | 2,18E-04 | -<br>1,9250103 |                  |                                    |
| 16673820 | 2,36E-04 | 1,6444788      |                  |                                    |
| 16829885 | 2,38E-04 | 2,011357       | 5694             | PSMB6                              |
| 17028338 | 2,41E-04 | -<br>2,3941314 | 3119///100293977 | HLA-DQB1 LOC100293977 HLA-DQB1-AS1 |
| 16856946 | 2,42E-04 | 1,955492       | 4782             | NFIC                               |
| 17090881 | 2,42E-04 | 1,5250567      | 266655           | LINC00094                          |
| 17104122 | 2,42E-04 | 2,0575356      | 28986            | MAGEH1                             |
| 17078342 | 2,45E-04 | 1,7429962      | 6921             | TCEB1                              |
| 17038622 | 2,49E-04 | -2,413997      | 3119///100293977 | HLA-DQB1 LOC100293977              |
| 16754324 | 2,51E-04 | 1,3948262      | 552889           | ATXN7L3B                           |

|          |          |                |                                     |                                             |
|----------|----------|----------------|-------------------------------------|---------------------------------------------|
| 17040375 | 2,53E-04 | -1,553913      | 3135                                | HLA-G                                       |
| 16910953 | 2,56E-04 | 1,4029346      | 64949                               | MRPS26                                      |
| 17113696 | 2,59E-04 | -<br>1,6400647 | 158801                              | NKAPP1                                      |
| 16875056 | 2,59E-04 | -1,776537      | 55769                               | ZNF83                                       |
| 17033604 | 2,70E-04 | -4,291426      | 3122                                | HLA-DRA                                     |
| 16783620 | 2,80E-04 | -<br>1,5098186 |                                     |                                             |
| 16840723 | 2,80E-04 | 2,3185096      | 112483                              | SAT2                                        |
| 16908822 | 2,85E-04 | 1,6947323      | 79586                               | CHPF                                        |
| 16993268 | 2,85E-04 | 1,6858522      | 3182                                | HNRNPAB                                     |
| 17115669 | 2,88E-04 | -<br>1,7051452 | 30848                               | CTAG2                                       |
| 16737636 | 2,93E-04 | 2,2720232      |                                     |                                             |
| 16863684 | 2,93E-04 | 1,9920082      | 6415                                | SEPW1                                       |
| 16959805 | 2,93E-04 | 1,5080291      | 5947                                | RBP1                                        |
| 17105524 | 2,93E-04 | 1,728715       | 51566                               | ARMCX3                                      |
| 16879923 | 3,00E-04 | 1,4225831      | 2956                                | MSH6                                        |
| 16702503 | 3,02E-04 | 1,4805772      | 8872                                | CDC123                                      |
| 16720392 | 3,02E-04 | 1,595438       | 977                                 | CD151                                       |
| 17035880 | 3,02E-04 | -4,303137      | 3122                                | HLA-DRA                                     |
| 16861118 | 3,03E-04 | 1,9661225      | 1340                                | COX6B1                                      |
| 17038596 | 3,03E-04 | -<br>4,3075366 | 3122                                | HLA-DRA                                     |
| 17041225 | 3,03E-04 | -4,306221      | 3122                                | HLA-DRA                                     |
| 17007292 | 3,18E-04 | -<br>2,1197865 | 3118///100509457///100507718///3117 | HLA-DQA2 LOC100509457 LOC100507718 HLA-DQA1 |
| 16808550 | 3,26E-04 | -<br>2,4913206 | 100652936                           | LOC100652936                                |
| 16690511 | 3,27E-04 | 2,0215955      | 6884                                | TAF13                                       |



|          |          |                |                      |                       |
|----------|----------|----------------|----------------------|-----------------------|
| 17003479 | 3,28E-04 | 1,9138018      | 55651                | NHP2                  |
| 16688339 | 3,31E-04 | 2,0328815      | 79971                | WLS                   |
| 17020731 | 3,38E-04 | -<br>2,5204964 |                      |                       |
| 16955064 | 3,45E-04 | 2,2849724      | 7086                 | TKT                   |
| 16992456 | 3,45E-04 | 1,5734212      | 8992                 | ATP6V0E1              |
| 16913263 | 3,45E-04 | 1,4530597      | 2036                 | EPB41L1               |
| 16983172 | 3,48E-04 | 1,6297066      | 22948                | CCT5                  |
| 17033646 | 3,48E-04 | -<br>2,2227404 | 3118///3117          | HLA-DQA2 HLA-DQA1     |
| 16663317 | 3,57E-04 | 1,5020454      | 4904                 | YBX1                  |
| 16981219 | 3,59E-04 | -<br>2,1647646 | 55601                | DDX60                 |
| 16776883 | 3,61E-04 | 1,6396625      | 55002                | TMCO3                 |
| 16823083 | 3,62E-04 | 1,547804       | 283871               | PGP                   |
| 16873391 | 3,63E-04 | 1,6126294      | 6633                 | SNRPD2                |
| 16775421 | 3,66E-04 | 1,6785153      | 7347                 | UCHL3                 |
| 16854928 | 3,69E-04 | 1,4303629      | 498                  | ATP5A1                |
| 16822652 | 3,72E-04 | 1,2853354      | 115939               | TSR3                  |
| 16873987 | 3,73E-04 | 1,4970053      | 6141                 | RPL18                 |
| 16985079 | 3,73E-04 | 1,7719582      | 91942                | NDUFAF2               |
| 17042548 | 3,73E-04 | -<br>2,7842646 | 3113                 | HLA-DPA1              |
| 17081943 | 3,73E-04 | 1,501881       |                      |                       |
| 16663989 | 3,76E-04 | 1,4919182      | 94163///26811///6202 | SNORD38B SNORD55 RPS8 |
| 16840970 | 3,76E-04 | 1,2298057      | 6154                 | RPL26                 |
| 17000485 | 3,76E-04 | 1,5273952      | 3313                 | HSPA9                 |
| 17115453 | 3,76E-04 | 1,3496842      | 4204                 | MECP2                 |
| 16731103 | 3,79E-04 | -<br>1,6710529 |                      |                       |

|          |          |                |       |          |
|----------|----------|----------------|-------|----------|
| 16775643 | 3,79E-04 | 1,4824375      | 54602 | NDFIP2   |
| 16778559 | 3,79E-04 | -<br>1,6915033 | 94240 | EPSTI1   |
| 16923031 | 3,79E-04 | -1,94473       | 4599  | MX1      |
| 17017244 | 3,79E-04 | 1,4010814      | 7917  | BAG6     |
| 17031139 | 3,79E-04 | -4,12354       | 3122  | HLA-DRA  |
| 17031887 | 3,79E-04 | 1,3989016      |       |          |
| 17034357 | 3,79E-04 | 1,40188        |       |          |
| 17056358 | 3,79E-04 | 1,4584978      | 79017 | GGCT     |
| 17070242 | 3,79E-04 | -2,767433      |       |          |
| 17084966 | 3,79E-04 | 1,3541204      | 9380  | GRHPR    |
| 17106604 | 3,79E-04 | 1,5992155      | 4694  | NDUFA1   |
| 16842766 | 3,79E-04 | 1,9763907      | 6388  | SDF2     |
| 17039400 | 3,79E-04 | 1,4002092      |       |          |
| 17110429 | 3,79E-04 | 1,8499894      | 54539 | NDUFB11  |
| 16858122 | 3,85E-04 | 1,555652       | 51073 | MRPL4    |
| 16873541 | 3,85E-04 | 1,6260523      | 55228 | PNMAL1   |
| 17017428 | 3,85E-04 | 1,2796769      | 7407  | VARS     |
| 17028313 | 3,85E-04 | -<br>3,9053702 | 3122  | HLA-DRA  |
| 16788190 | 3,89E-04 | -<br>1,4826707 |       |          |
| 16873313 | 3,91E-04 | 1,6264542      | 2067  | ERCC1    |
| 16868564 | 3,91E-04 | 1,7818547      | 8666  | EIF3G    |
| 17032533 | 3,92E-04 | -2,860152      | 3113  | HLA-DPA1 |
| 16820076 | 3,92E-04 | 2,0519803      | 29100 | TMEM208  |
| 17087498 | 3,92E-04 | 2,2672267      | 10952 | SEC61B   |
| 16900148 | 3,94E-04 | -<br>4,3953347 |       | IGKV2-24 |
| 17018039 | 3,94E-04 | -2,854245      | 3113  | HLA-DPA1 |

|          |          |                |                              |                                    |
|----------|----------|----------------|------------------------------|------------------------------------|
| 17029102 | 3,94E-04 | 1,3882107      |                              |                                    |
| 17105010 | 3,96E-04 | 1,7143223      | 1349                         | COX7B                              |
| 17073934 | 3,98E-04 | -<br>1,3500898 |                              |                                    |
| 17038629 | 4,10E-04 | -2,084153      | 3118///3117                  | HLA-DQA2 HLA-DQA1                  |
| 16714880 | 4,12E-04 | 1,8399564      | 56521                        | DNAJC12                            |
| 16834540 | 4,15E-04 | 1,799594       | 6155                         | RPL27                              |
| 17028326 | 4,17E-04 | -4,290646      | 3117///100509457///100507718 | HLA-DQA1 LOC100509457 LOC100507718 |
| 16670492 | 4,20E-04 | 1,8319719      | 54460                        | MRPS21                             |
| 16693005 | 4,20E-04 | -1,54058       | 6944                         | VPS72                              |
| 16838917 | 4,20E-04 | 1,7126404      | 51529                        | ANAPC11                            |
| 16858344 | 4,20E-04 | 1,4060313      | 6597                         | SMARCA4                            |
| 16972824 | 4,20E-04 | 1,4285648      | 56977                        | STOX2                              |
| 17100641 | 4,20E-04 | -1,281491      |                              |                                    |
| 17117533 | 4,20E-04 | -<br>1,8627638 | 7704                         | ZBTB16                             |
| 16706712 | 4,27E-04 | 1,624591       | 27069                        | GHITM                              |
| 16918589 | 4,27E-04 | 1,4979943      | 2937                         | GSS                                |
| 16927198 | 4,27E-04 | 1,4395759      | 5902                         | RANBP1                             |
| 17005385 | 4,27E-04 | 1,6059514      | 55856                        | ACOT13                             |
| 17006197 | 4,27E-04 | 1,2888417      | 135644                       | TRIM40                             |
| 16791849 | 4,34E-04 | 2,0812824      | 171546                       | SPTSSA                             |
| 16955975 | 4,54E-04 | 1,4500909      | 8801                         | SUCLG2                             |
| 17032993 | 4,54E-04 | -<br>1,9589996 | 3133                         | HLA-E                              |
| 17040037 | 4,54E-04 | -<br>2,6634483 | 3113                         | HLA-DPA1                           |
| 17098071 | 4,54E-04 | 1,6792761      | 4702                         | NDUFA8                             |
| 16759500 | 4,56E-04 | 1,4246106      | 79050                        | NOC4L                              |
| 17105706 | 4,60E-04 | 1,7512504      | 51186                        | WBP5                               |

|          |          |                |                              |                                    |
|----------|----------|----------------|------------------------------|------------------------------------|
| 16946228 | 4,62E-04 | 1,3108915      | 56945                        | MRPS22                             |
| 16734570 | 4,63E-04 | 1,3121299      | 114879                       | OSBPL5                             |
| 17038609 | 4,63E-04 | -<br>3,9529762 | 3117///100509457///100507718 | HLA-DQA1 LOC100509457 LOC100507718 |
| 16861841 | 4,63E-04 | 1,6940037      | 27335                        | EIF3K                              |
| 16669169 | 4,73E-04 | -2,375645      | 914                          | CD2                                |
| 16900098 | 4,75E-04 | -<br>15,859056 | 50802                        | IGK@ IGKJ3                         |
| 16948909 | 4,75E-04 | 1,4795308      | 1981                         | EIF4G1                             |
| 16859825 | 4,79E-04 | 1,4790732      | 7311                         | UBA52                              |
| 16866951 | 4,79E-04 | 1,4345804      | 84823                        | LMNB2                              |
| 16956027 | 4,79E-04 | 1,5627555      | 7110                         | TMF1                               |
| 17041883 | 4,79E-04 | 1,3805054      |                              |                                    |
| 17054950 | 4,79E-04 | 1,2525753      | 27102                        | EIF2AK1                            |
| 16666485 | 4,80E-04 | -2,123223      | 10964                        | IFI44L                             |
| 16689384 | 4,85E-04 | -<br>3,7952335 | 115361                       | GBP4                               |
| 16733435 | 4,85E-04 | 1,4534632      | 334                          | APLP2                              |
| 16775719 | 4,85E-04 | -<br>1,5986516 |                              |                                    |
| 16782082 | 4,85E-04 | -<br>1,8777298 |                              | TRAJ21                             |
| 16872229 | 4,85E-04 | 1,5755798      | 6217                         | RPS16                              |
| 16979944 | 4,85E-04 | -2,223742      |                              |                                    |
| 16669632 | 4,86E-04 | -<br>1,4101589 |                              |                                    |
| 16740406 | 4,86E-04 | -<br>1,3577433 |                              |                                    |
| 16833787 | 4,86E-04 | 1,5376647      | 84152                        | PPP1R1B                            |
| 16857080 | 4,86E-04 | 1,4704349      | 51588                        | PIAS4                              |

|          |          |                |                                            |                                                      |
|----------|----------|----------------|--------------------------------------------|------------------------------------------------------|
| 17057990 | 4,86E-04 | 1,886516       | 389493                                     | NUPR1L                                               |
| 17098880 | 4,86E-04 | 1,3772095      | 89891                                      | WDR34                                                |
| 17030233 | 4,88E-04 | 1,2946566      | 135644                                     | TRIM40                                               |
| 16864159 | 4,89E-04 | 1,3939202      | 6205                                       | RPS11                                                |
| 17074004 | 4,89E-04 | 1,4888557      |                                            |                                                      |
| 17103572 | 4,89E-04 | 1,3165352      | 28952                                      | CCDC22                                               |
| 16695508 | 4,98E-04 | 1,7983317      | 100131187///50848                          | TSTD1 F11R                                           |
| 17035037 | 4,98E-04 | -<br>1,5422388 | 3135                                       | HLA-G                                                |
| 16684000 | 5,02E-04 | 1,6336333      | 8547                                       | FCN3                                                 |
| 17006261 | 5,02E-04 | -<br>1,9484694 | 3133                                       | HLA-E                                                |
| 16821519 | 5,03E-04 | 1,5992388      | 9100                                       | USP10                                                |
| 16717359 | 5,03E-04 | 1,6961842      | 2805                                       | GOT1                                                 |
| 16744888 | 5,03E-04 | 1,4259928      | 53826///100533181///486                    | FXVD6 FXVD6-FXVD2                                    |
| 16900100 | 5,03E-04 | -4,665438      |                                            | IGKV1-5                                              |
| 17035115 | 5,15E-04 | -<br>1,9465622 | 3133                                       | HLA-E                                                |
| 16972764 | 5,17E-04 | 1,7116982      | 3622                                       | ING2                                                 |
| 17103560 | 5,21E-04 | 1,7146511      | 5355                                       | PLP2                                                 |
| 16935623 | 5,21E-04 | 1,6334113      | 27341                                      | RRP7A                                                |
| 16690638 | 5,24E-04 | 1,9852717      | 2947                                       | GSTM3                                                |
| 17035141 | 5,24E-04 | 1,5369188      | 23                                         | ABCF1                                                |
| 17039907 | 5,24E-04 | -<br>2,3113365 | 3125///3123///3126///100507714///100507709 | HLA-DRB3 HLA-DRB1 HLA-DRB4 LOC100507714 LOC100507709 |
| 17040488 | 5,25E-04 | -1,948986      | 3133                                       | HLA-E                                                |
| 17027443 | 5,28E-04 | -<br>1,9494969 | 3133                                       | HLA-E                                                |
| 17027471 | 5,29E-04 | 1,510678       | 23                                         | ABCF1                                                |
| 16751554 | 5,30E-04 | 1,6481707      | 3875                                       | KRT18                                                |

|          |          |                |                                            |                                                      |
|----------|----------|----------------|--------------------------------------------|------------------------------------------------------|
| 16825956 | 5,46E-04 | 1,6450245      | 79001                                      | VKORC1                                               |
| 17037774 | 5,47E-04 | -<br>1,9468852 | 3133                                       | HLA-E                                                |
| 17059628 | 5,47E-04 | 1,7681941      | 1595///401387                              | CYP51A1 LRRD1                                        |
| 16767744 | 5,47E-04 | -2,128821      |                                            |                                                      |
| 16771361 | 5,47E-04 | 1,8348217      |                                            |                                                      |
| 16916312 | 5,47E-04 | 1,4675679      | 128637                                     | TBC1D20                                              |
| 16946439 | 5,47E-04 | 1,733469       | 9616                                       | RNF7                                                 |
| 17006122 | 5,47E-04 | -1,561376      | 3135                                       | HLA-G                                                |
| 16879276 | 5,58E-04 | 1,6322337      | 729967                                     | MORN2                                                |
| 17040514 | 5,58E-04 | 1,5255629      | 23                                         | ABCF1                                                |
| 16883426 | 5,61E-04 | 1,5050399      | 9669                                       | EIF5B                                                |
| 17057884 | 5,61E-04 | 1,522783       | 23480                                      | SEC61G                                               |
| 16943107 | 5,64E-04 | 1,6371412      | 131544                                     | CRYBG3                                               |
| 17099498 | 5,68E-04 | 1,7097604      | 6834                                       | SURF1                                                |
| 16733759 | 5,70E-04 | -1,516403      | 283177                                     | LOC283177                                            |
| 16868654 | 5,70E-04 | 1,6896214      | 112812///100125288                         | FDX1L ZGLP1                                          |
| 17000460 | 5,70E-04 | 1,8826665      |                                            |                                                      |
| 17033021 | 5,70E-04 | 1,528959       | 23                                         | ABCF1                                                |
| 16867370 | 5,72E-04 | 2,2436762      | 56005                                      | C19orf10                                             |
| 17030288 | 5,72E-04 | -<br>1,9399768 | 3133                                       | HLA-E                                                |
| 16856581 | 5,74E-04 | 1,4948384      | 6209                                       | RPS15                                                |
| 16745026 | 5,78E-04 | 1,3933623      |                                            |                                                      |
| 16838879 | 5,80E-04 | 1,5851287      | 6182///1468                                | MRPL12 SLC25A10                                      |
| 16840599 | 5,87E-04 | 1,9578655      | 1366                                       | CLDN7                                                |
| 17034714 | 5,89E-04 | -<br>1,5274811 | 3125///3127///3123///100507714///100507709 | HLA-DRB3 HLA-DRB5 HLA-DRB1 LOC100507714 LOC100507709 |
| 17037800 | 5,89E-04 | 1,5354346      | 23                                         | ABCF1                                                |

|          |          |                |                  |                                             |
|----------|----------|----------------|------------------|---------------------------------------------|
| 17063656 | 5,91E-04 | 1,4705685      | 51650            | MRPS33                                      |
| 17114033 | 5,91E-04 | -<br>1,4397829 |                  |                                             |
| 17030176 | 5,91E-04 | -<br>1,5242691 | 3135             | HLA-G                                       |
| 17091312 | 5,98E-04 | 1,3983288      | 85014            | TMEM141                                     |
| 16767663 | 6,05E-04 | 1,4631851      |                  |                                             |
| 16941176 | 6,05E-04 | 1,3185245      | 29890            | RBM15B                                      |
| 16939495 | 6,07E-04 | 1,2913595      | 9045             | RPL14                                       |
| 16668109 | 6,09E-04 | -<br>2,6850965 | 677766           | SCARNA2                                     |
| 16731945 | 6,12E-04 | 1,5293533      | 372              | ARCN1                                       |
| 16738536 | 6,12E-04 | 1,7855188      | 26519            | TIMM10                                      |
| 16657910 | 6,16E-04 | 1,4729313      | 8511///8510      | MMP23A MMP23B                               |
| 16822913 | 6,17E-04 | 2,0387099      | 6187///26784     | RPS2 SNORA64 RPS2P7 RPS2P5 RPL17P43 RPS2P55 |
| 17098411 | 6,29E-04 | 2,2478664      | 3309             | HSPA5                                       |
| 16823193 | 6,37E-04 | 1,6905437      | 6923             | TCEB2                                       |
| 16867511 | 6,37E-04 | 1,3496263      | 9361             | LONP1                                       |
| 17019549 | 6,37E-04 | 1,7143139      | 64928            | MRPL14                                      |
| 17034851 | 6,37E-04 | -<br>2,7524571 | 3113             | HLA-DPA1                                    |
| 16821139 | 6,39E-04 | 1,3650318      | 22879            | MON1B                                       |
| 17063066 | 6,45E-04 | 1,996076       | 1937///100500804 | EEF1G MIR3654                               |
| 16701275 | 6,53E-04 | -<br>1,4531077 |                  |                                             |
| 16804942 | 6,58E-04 | 1,5855389      | 5045             | FURIN                                       |
| 17006288 | 6,58E-04 | 1,4693253      | 23               | ABCF1                                       |
| 16693173 | 6,58E-04 | 1,3236822      | 65005            | MRPL9                                       |
| 16857897 | 6,63E-04 | 1,5994787      | 9230             | RAB11B                                      |
| 17082873 | 6,73E-04 | 1,3427573      | 6132             | RPL8                                        |

|          |          |                |                                            |                                                      |
|----------|----------|----------------|--------------------------------------------|------------------------------------------------------|
| 17032930 | 6,75E-04 | 1,2896377      | 135644                                     | TRIM40                                               |
| 16845263 | 6,77E-04 | 1,7816669      | 8678                                       | BECN1                                                |
| 17035064 | 6,77E-04 | 1,5667026      | 30834                                      | ZNRD1                                                |
| 16751190 | 6,80E-04 | 1,7352667      | 25840                                      | METTL7A                                              |
| 16672654 | 6,84E-04 | -1,792749      | 57823                                      | SLAMF7                                               |
| 16899086 | 6,84E-04 | 1,7737008      | 388962                                     | BOLA3                                                |
| 17030316 | 6,84E-04 | 1,5254252      | 23                                         | ABCF1                                                |
| 17070331 | 6,84E-04 | 2,0585506      | 92421                                      | CHMP4C                                               |
| 17027187 | 6,87E-04 | -<br>2,7348022 | 3113                                       | HLA-DPA1                                             |
| 16674269 | 6,90E-04 | -<br>1,3482178 | 84066                                      | TEX35                                                |
| 16661533 | 6,92E-04 | 1,4870572      | 93974                                      | ATPIF1                                               |
| 17109432 | 6,92E-04 | 1,4719306      | 10742                                      | RAI2                                                 |
| 16931400 | 6,97E-04 | 1,4238071      | 55687                                      | TRMU                                                 |
| 16700023 | 6,99E-04 | 1,4968258      | 64746                                      | ACBD3                                                |
| 16920091 | 6,99E-04 | -<br>1,5425156 |                                            |                                                      |
| 16863148 | 7,02E-04 | 1,5346295      | 1209                                       | CLPTM1                                               |
| 17073527 | 7,11E-04 | 1,5185572      | 54512                                      | EXOSC4                                               |
| 16893992 | 7,13E-04 | 1,4896117      | 55256                                      | ADI1                                                 |
| 17037331 | 7,13E-04 | -<br>2,7331676 | 3113                                       | HLA-DPA1                                             |
| 16846661 | 7,22E-04 | 1,5710038      | 51264                                      | MRPL27                                               |
| 17032882 | 7,27E-04 | -<br>1,6889688 | 3105                                       | HLA-A                                                |
| 17032389 | 7,31E-04 | -<br>1,5086173 | 3125///3127///3123///100507714///100507709 | HLA-DRB3 HLA-DRB5 HLA-DRB1 LOC100507714 LOC100507709 |
| 16718493 | 7,35E-04 | -<br>1,3642064 |                                            |                                                      |



|          |          |                |                      |                |
|----------|----------|----------------|----------------------|----------------|
| 16729548 | 7,37E-04 | 1,5901824      | 6234                 | RPS28          |
| 17113448 | 7,37E-04 | -<br>1,6954516 | 3598                 | IL13RA2        |
| 16836131 | 7,42E-04 | 1,4675616      | 654364///4831///4830 | NME1-NME2      |
| 16761923 | 7,42E-04 | 1,9830223      |                      |                |
| 17103804 | 7,42E-04 | 1,4660379      | 9500                 | MAGED1         |
| 16817721 | 7,46E-04 | 1,8282983      | 253982               | ASPHD1         |
| 16684175 | 7,46E-04 | 1,799823       | 8420///6080          | SNHG3 SNORA73A |
| 16995957 | 7,50E-04 | 1,3802195      | 10605                | PAIP1          |
| 16765226 | 7,57E-04 | -<br>1,3369949 | 3695                 | ITGB7          |
| 16804789 | 7,59E-04 | 1,6622634      |                      |                |
| 16760406 | 7,65E-04 | 1,5586406      | 51258                | MRPL51         |
| 16797213 | 7,65E-04 | 1,3617967      | 55038                | CDCA4          |
| 16868920 | 7,65E-04 | 1,7567555      | 374882               | TMEM205        |
| 16940738 | 7,65E-04 | 1,5341284      | 327                  | APEH           |
| 17030207 | 7,65E-04 | 1,5364094      | 30834                | ZNRD1          |
| 17035022 | 7,65E-04 | -<br>1,5157967 | 3134                 | HLA-F          |
| 17036785 | 7,65E-04 | 1,2643965      |                      |                |
| 16910645 | 7,69E-04 | 1,5378715      | 83541                | FAM110A        |
| 16940535 | 7,72E-04 | 1,3568053      | 11277                | TREX1          |
| 16658568 | 7,72E-04 | 1,4761195      | 11315                | PARK7          |
| 16733858 | 7,72E-04 | 1,2966557      | 59307                | SIGIRR         |
| 16886757 | 7,72E-04 | 1,4381158      | 8502                 | PKP4           |
| 16894361 | 7,72E-04 | 1,2200769      | 10971                | YWHAQ          |
| 16922428 | 7,72E-04 | 1,3544208      | 54065                | FAM165B        |
| 17026125 | 7,72E-04 | 1,5344347      | 30834                | ZNRD1          |
| 17090155 | 7,74E-04 | -2,246233      |                      |                |

|          |          |                |                                   |                           |
|----------|----------|----------------|-----------------------------------|---------------------------|
| 16774512 | 7,75E-04 | 1,5239638      | 100287803                         | LOC100287803              |
| 17106601 | 7,76E-04 | 1,2618986      |                                   |                           |
| 16724235 | 7,76E-04 | 1,5763346      | 120071                            | GYLTL1B                   |
| 16747612 | 7,76E-04 | 1,5496801      | 113246                            | C12orf57                  |
| 16875796 | 7,76E-04 | 1,4866302      | 163033                            | ZNF579                    |
| 16681477 | 7,82E-04 | 1,4103892      | 22883                             | CLSTN1                    |
| 16825410 | 7,82E-04 | 1,6843439      | 7284///100616256                  | TUFM MIR4721              |
| 16925037 | 7,90E-04 | 1,4918102      | 56683                             | C21orf59                  |
| 16875848 | 7,97E-04 | 1,514407       | 126208                            | ZNF787                    |
| 16871613 | 8,01E-04 | 2,4834473      | 5438                              | POLR2I                    |
| 16866718 | 8,04E-04 | 1,7795888      | 10975                             | UQCR11                    |
| 17049702 | 8,11E-04 | 1,476322       | 10467                             | ZNHIT1                    |
| 16682042 | 8,16E-04 | 2,0886676      | 440567                            | UQCRHL                    |
| 16859446 | 8,18E-04 | 1,5160171      | 79629                             | OCEL1                     |
| 16895647 | 8,18E-04 | 1,7834874      | 10113                             | PREB                      |
| 16840759 | 8,34E-04 | 1,6581913      | 84316                             | LSMD1                     |
| 16661342 | 8,37E-04 | 1,5463104      | 388610                            | TRNP1                     |
| 16873534 | 8,40E-04 | 1,4265156      | 83987                             | CCDC8                     |
| 16660933 | 8,41E-04 | 1,5582517      | 26119                             | LDLRAP1                   |
| 16677748 | 8,41E-04 | 1,3814014      | 375056                            | MIA3                      |
| 16735734 | 8,41E-04 | -<br>1,5068582 | 100463486///100462981///100616263 | MTRNR2L8 MTRNR2L2 MIR4485 |
| 16693656 | 8,42E-04 | 1,4254094      | 5872                              | RAB13                     |
| 17029847 | 8,42E-04 | -<br>2,5091522 | 3113                              | HLA-DPA1                  |
| 16661323 | 8,42E-04 | 1,6138302      | 10726                             | NUDC                      |
| 16734154 | 8,49E-04 | 1,8446877      | 5441                              | POLR2L                    |
| 16945320 | 8,49E-04 | 1,7005284      | 22820                             | COPG1                     |

|          |          |                |                                 |                        |
|----------|----------|----------------|---------------------------------|------------------------|
| 16675578 | 8,54E-04 | -<br>2,3872492 | 5788                            | PTPRC                  |
| 16995601 | 8,58E-04 | -<br>1,9592437 | 2533                            | FYB                    |
| 17022949 | 8,58E-04 | -<br>1,7356286 |                                 |                        |
| 17051659 | 8,58E-04 | -<br>1,5514944 |                                 |                        |
| 17071579 | 8,63E-04 | -1,683079      |                                 |                        |
| 17118407 | 8,63E-04 | 1,3604668      | 100132249///643395              | LOC100132249 LOC643395 |
| 16858235 | 8,76E-04 | 1,5124986      | 3609                            | ILF3                   |
| 16792501 | 8,77E-04 | 1,4168247      | 6166                            | RPL36AL                |
| 16705450 | 8,81E-04 | 1,4514829      | 79009                           | DDX50                  |
| 16822809 | 8,81E-04 | 1,5071676      | 65993                           | MRPS34                 |
| 16860946 | 8,81E-04 | 1,6344249      | 51599                           | LSR                    |
| 16878406 | 8,81E-04 | 1,5841832      | 9553                            | MRPL33                 |
| 16893414 | 8,81E-04 | 1,3324766      | 50636                           | ANO7                   |
| 16984801 | 8,81E-04 | -<br>2,8032846 | 3001                            | GZMA                   |
| 17044829 | 8,81E-04 | 1,2949237      | 100526825///84182///11185///358 | INMT-FAM188B AQP1      |
| 16934434 | 8,83E-04 | -<br>1,3952016 | 80833                           | APOL3                  |
| 16844207 | 8,83E-04 | -<br>1,5551863 | 22806                           | IKZF3                  |
| 16851847 | 8,87E-04 | -<br>1,3405286 |                                 |                        |
| 16878378 | 8,87E-04 | 1,5074565      | 22950                           | SLC4A1AP               |
| 17035918 | 8,87E-04 | -1,978456      | 3118///3117                     | HLA-DQA2 HLA-DQA1      |
| 17072222 | 8,87E-04 | 2,237585       | 100506980                       | LOC100506980           |
| 16992809 | 8,91E-04 | 1,9060568      | 192286                          | HIGD2A                 |
| 17099484 | 8,93E-04 | 1,3430551      | 6837                            | MED22                  |

|          |          |                |                           |                        |
|----------|----------|----------------|---------------------------|------------------------|
| 16789524 | 8,99E-04 | 1,9841598      |                           |                        |
| 16837754 | 9,20E-04 | 1,8571781      | 51081                     | MRPS7                  |
| 17118026 | 9,21E-04 | 1,3315802      |                           |                        |
| 17026808 | 9,24E-04 | 1,2493093      |                           |                        |
| 16846954 | 9,30E-04 | 1,6878409      | 51649                     | MRPS23                 |
| 17008534 | 9,30E-04 | 1,5907764      | 100188893///29964         | TOMM6 PRICKLE4         |
| 17094434 | 9,31E-04 | 1,3810116      | 100132249///643395        | LOC100132249 LOC643395 |
| 16741833 | 9,37E-04 | 1,4488616      | 10809                     | STARD10                |
| 16820572 | 9,42E-04 | 1,3903086      | 27183                     | VPS4A                  |
| 16880256 | 9,46E-04 | 1,4738526      | 112942                    | CCDC104                |
| 16671381 | 9,49E-04 | 1,7039571      | 10456                     | HAX1                   |
| 16896320 | 9,51E-04 | 1,456253       | 25940                     | FAM98A                 |
| 16899459 | 9,51E-04 | -1,487686      |                           |                        |
| 17056968 | 9,51E-04 | 1,5037178      | 136647                    | MPLKIP                 |
| 16862145 | 9,54E-04 | 1,6365764      | 5704                      | PSMC4                  |
| 16948989 | 9,54E-04 | 1,4602902      | 5437                      | POLR2H                 |
| 16963891 | 9,54E-04 | 1,3656112      |                           |                        |
| 17032067 | 9,54E-04 | 1,2539351      |                           |                        |
| 16854854 | 9,59E-04 | -<br>1,6034994 | 100422829                 | MIR4319                |
| 16748502 | 9,70E-04 | 1,2988685      | 51202                     | DDX47                  |
| 17053775 | 9,70E-04 | 1,6863849      | 57180                     | ACTR3B                 |
| 17071188 | 9,70E-04 | 1,5212528      | 92140                     | MTDH                   |
| 16791167 | 9,74E-04 | 1,4505002      | 145553///100528064///4738 | MDP1 NEDD8-MDP1        |
| 17017575 | 9,77E-04 | 1,3908607      | 7936///100302242          | RDBP MIR1236           |
| 16848721 | 9,80E-04 | 1,6964691      | 10476                     | ATP5H                  |
| 16898578 | 9,88E-04 | 1,8060246      | 2673                      | GFPT1                  |
| 16882720 | 9,98E-04 | -9,656052      |                           | IGKV1D-39              |
